# Supplementary material
Source: PubMed Central journal article supplement (PMC7422621)
Supplement: bgaa002_suppl_supplementary_materials.pdf [file bgaa002_suppl_supplementary_materials.pdf]

Supplementary materials, Udquim et al.

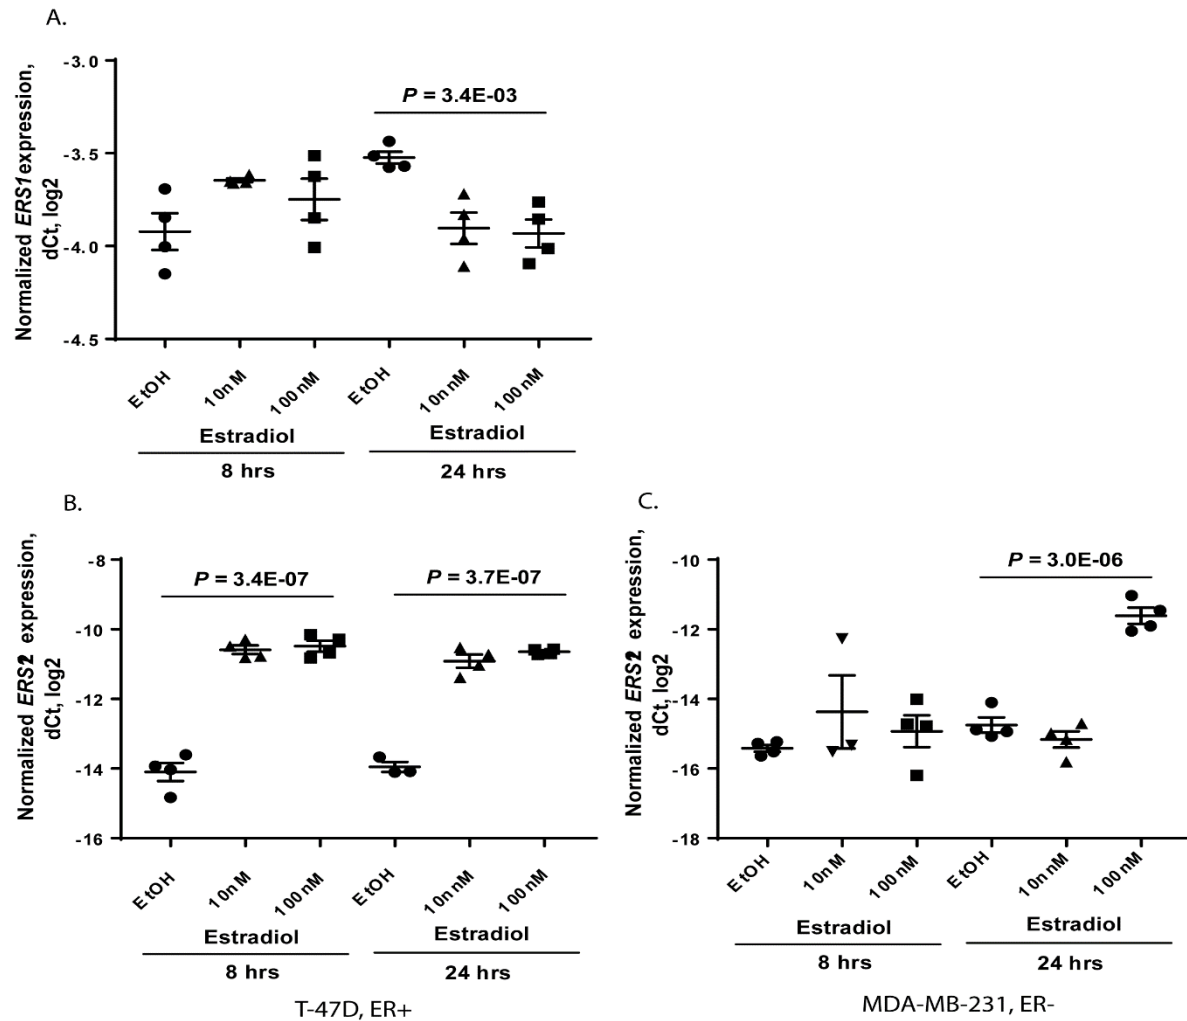

**Supplementary Figure 1.** Expression of *ESR1* and *ESR2* genes was normalized by endogenous controls (*GAPDH* and *PPIA*) in the ER+ and ER- cell lines treated with ethanol (EtOH, vehicle) or estradiol dissolved in EtOH. Less negative values correspond to a higher level of expression. P-values are for one-way ANOVA, based on biological replicates.
